# Supplementary material for: Adaptation of maize source leaf metabolism to stress related disturbances in carbon, nitrogen and phosphorus balance
Source: PubMed Central journal article supplement (PMC3716532; doi:10.1186/1471-2164-14-442), 2013-07-03

**Supplementary figure S1: Changes in metabolites connected to primary metabolism under low temperature, low N and low P stress.**  
 Data is presented as heatmaps for log2 fold changes in stressed vs control conditions.

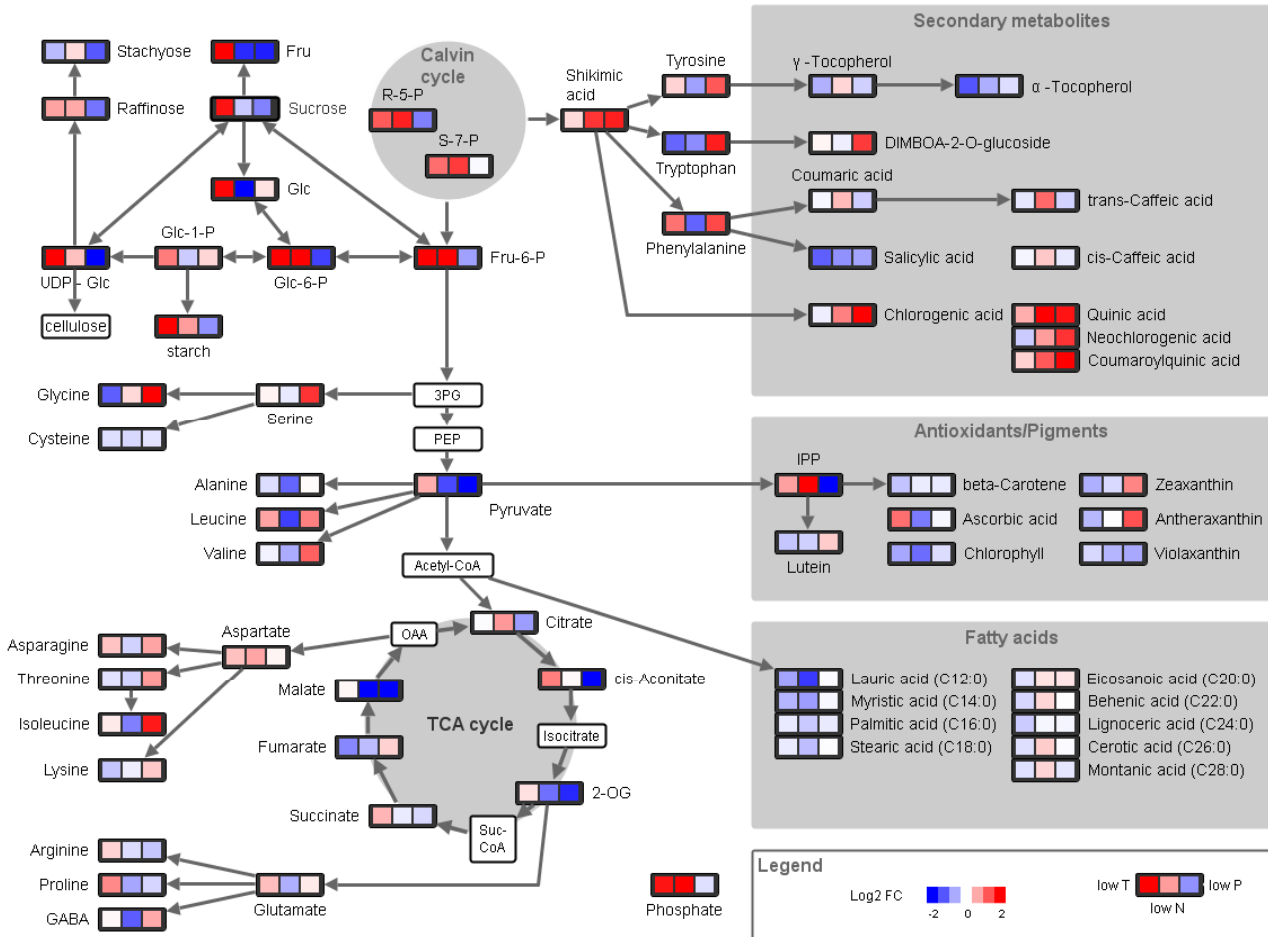

**Supplementary figure S2:** Expression of transcripts commonly up-regulated under low temperature, low nitrogen and low phosphorus conditions along the leaf gradient (tip – base)

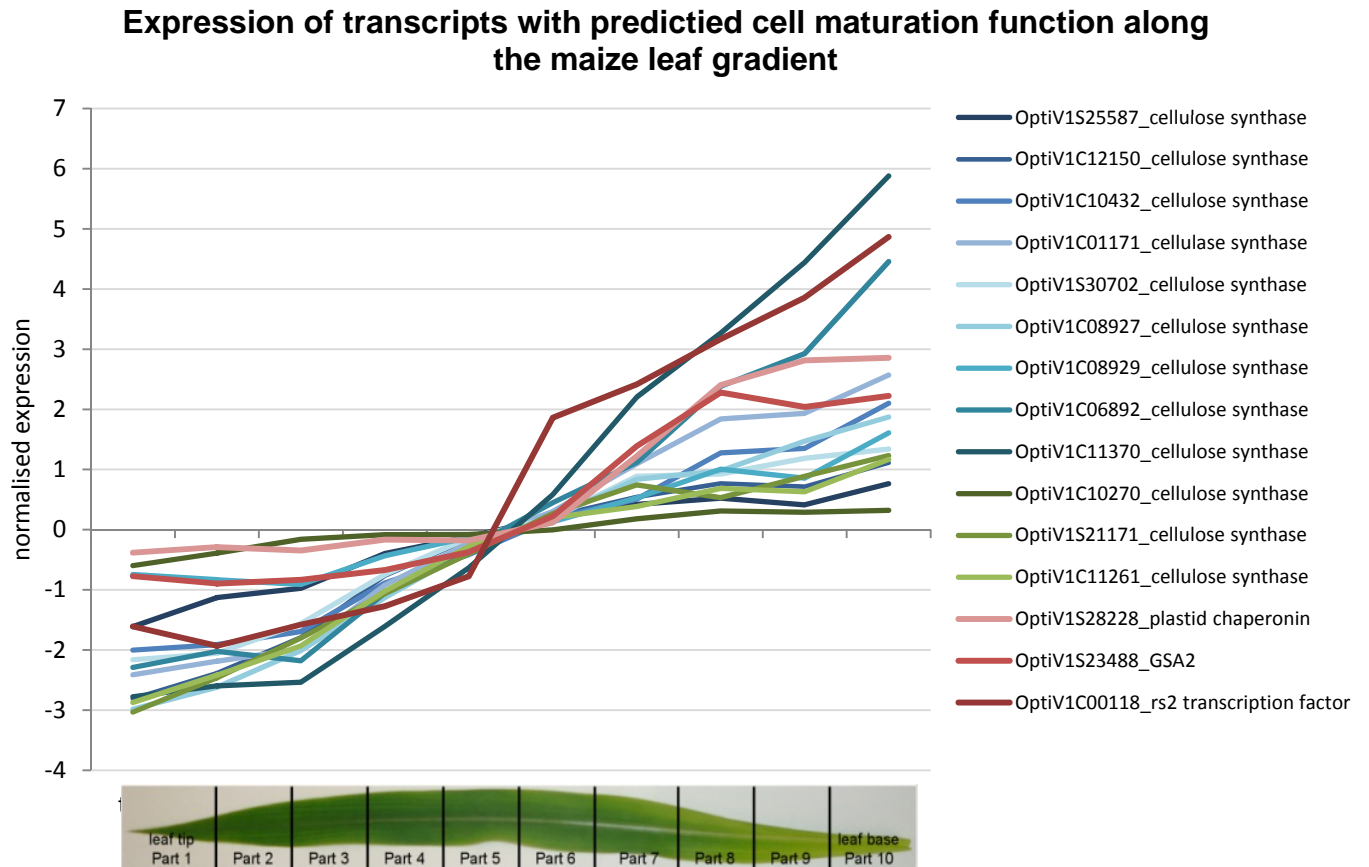

Supplement: 1471-2164-14-442-S2.pdf [file 1471-2164-14-442-S2.pdf]
